# Supplementary material for: Cyan-emitting Ti4+- and Mn2+-coactivated Mg2SnO4 as a potential phosphor to enlarge the color gamut for field emission display
Source: Royal Society of Chemistry journal article supplement (doi:10.1039/c1jm00057h), 2011-01-01
Supplement: c1jm00057h.pdf [file c1jm00057h.pdf]

# Cyan-Emitting $Ti^{4+}$ - and $Mn^{2+}$ -Coactivated $Mg_2SnO_4$ as a Potential Phosphor to Enlarge Color Gamut for Field Emission Display

Guogang Li,<sup>a</sup> Xiao Zhang,<sup>b</sup> Chong Peng,<sup>a</sup> Mengmeng Shang,<sup>a</sup> Dongling Geng,<sup>a</sup> Ziyong Cheng<sup>a</sup> and Jun Lin<sup>\*a</sup>

<sup>a</sup> State Key Laboratory of Rare Earth Resource Utilization, Changchun Institute of Applied Chemistry, Chinese Academy of Sciences, Changchun 130022, P. R. China.

<sup>b</sup> College of Materials Science and Chemical Engineering, Harbin Engineering University Harbin, 150001 (P. R. China).

\* Corresponding author. Electronic mail: [jlin@ciac.jl.cn](mailto:jlin@ciac.jl.cn)

## Experimental Section:

**Preparation.** The  $\text{Mg}_2\text{SnO}_4$ : x mol%  $\text{Ti}^{4+}$ , y mol%  $\text{Mn}^{2+}$  powder samples were prepared by conventional solid state reaction. The doping concentrations of  $\text{Ti}^{4+}$  and  $\text{Mn}^{2+}$  were chosen as 0.1–5 mol% of  $\text{Sn}^{4+}$  and 0.01–1 mol% of  $\text{Mn}^{2+}$  in  $\text{Mg}_2\text{SnO}_4$ , respectively. Typically, stoichiometric amounts of  $\text{MgO}$ ,  $\text{SnO}_2$ ,  $\text{TiO}_2$ , and  $\text{MnCO}_3$  were thoroughly mixed with an appropriate amount of ethanol in an agate mortar and then dried at 90 °C for 2 h. The powder mixtures were sintered at 1200 °C for 4 h in air to produce the final samples. All chemicals are of analytical degree.

**Characterization.** The X-ray diffraction (XRD) measurements were carried out on a D8 Focus diffractometer using  $\text{Cu K}\alpha$  radiation ( $\lambda = 0.15405$  nm). The PL measurements were performed on a Hitachi F-4500 spectrophotometer equipped with a 150 W xenon lamp as the excitation source. The CL measurements were carried out in an ultra-highvacuum chamber ( $<10^{-8}$  Torr), where the phosphors were excited by an electron beam in the voltage range of 0.5–5.0 kV and different anode current density, and the emission spectra were recorded using an F-7000 spectrophotometer. Photoluminescence quantum yield (QY) was measured by absolute PL quantum yield measurement system C9920-02. The PL lifetimes of the samples were measured with a Lecroy Wave Runner 6100 Digital Oscilloscope (1GHz) using a tunable laser (pulse width 4 ns) as the excitation source (Continuum Sunlite OPO). All the measurements were performed at room temperature (RT).

**Table 1.** Ionic radii (Å) and their coordination number (CN) of Mg<sup>2+</sup>, Mn<sup>2+</sup>, Sn<sup>4+</sup> and Ti<sup>4+</sup>.

| Ion              | CN = 4                  |                                 | CN = 6                  |                                 |
|------------------|-------------------------|---------------------------------|-------------------------|---------------------------------|
|                  | Crystal radius (CR) (Å) | Effective ionic radius (IR) (Å) | Crystal radius (CR) (Å) | Effective ionic radius (IR) (Å) |
| Mg <sup>2+</sup> | 0.71                    | 0.57                            | 0.86                    | 0.72                            |
| Mn <sup>2+</sup> | 0.80                    | 0.66                            | 0.81                    | 0.67                            |
| Sn <sup>4+</sup> | —                       | —                               | 0.83                    | 0.69                            |
| Ti <sup>4+</sup> | —                       | —                               | 0.745                   | 0.605                           |

**Table 2.** The CIE chromaticity coordinates, emission colors of Mg<sub>2(1-y)</sub>Sn<sub>(1-x)</sub>O<sub>4</sub>: x mol% Ti<sup>4+</sup>, y mol% Mn<sup>2+</sup> (x = 0-3, y = 0-0.1) samples under the V<sub>a</sub> = 3.0 kV, J<sub>a</sub> = 50 μA/cm<sup>2</sup> electron beam excitation, and their quantum yields under λ<sub>ex</sub> = 244 nm UV light excitation.

| Sample | Mg <sub>2(1-y)</sub> Sn <sub>(1-x)</sub> O <sub>4</sub> : x mol% Ti <sup>4+</sup> , y mol% Mn <sup>2+</sup> | Quantum yield (%) | CIE chromaticity coordinates (X, Y) | Color |
|--------|-------------------------------------------------------------------------------------------------------------|-------------------|-------------------------------------|-------|
| S1     | x = 0, y = 0                                                                                                | —                 | (0.1780, 0.2449)                    | blue  |
| S2     | x = 2.0, y = 0                                                                                              | 35                | (0.1773, 0.2186)                    | blue  |
| S3     | x = 0, y = 0.1                                                                                              | 4                 | (0.0908, 0.5668)                    | green |
| S4     | x = 0.5, y = 0.01                                                                                           | 17                | (0.1512, 0.2717)                    | cyan  |
| S5     | x = 0.5, y = 0.025                                                                                          | 18                | (0.1464, 0.2871)                    | cyan  |
| S6     | x = 0.5, y = 0.05                                                                                           | 13                | (0.1409, 0.3185)                    | cyan  |
| S7     | x = 2.0, y = 0.01                                                                                           | 23                | (0.1637, 0.2574)                    | cyan  |
| S8     | x = 2.0, y = 0.025                                                                                          | 22                | (0.1647, 0.2819)                    | cyan  |
| S9     | x = 3.0, y = 0.01                                                                                           | 19                | (0.1676, 0.2397)                    | cyan  |

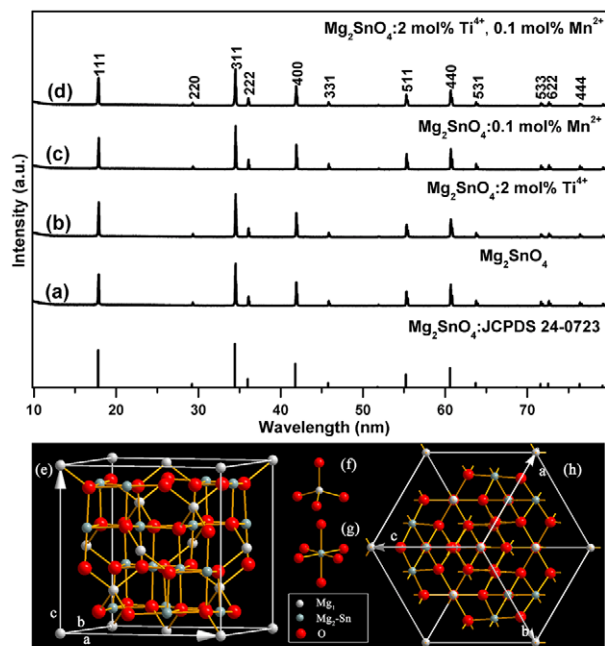

**Fig. S1** The XRD patterns of (a)  $\text{Mg}_2\text{SnO}_4$ , (b)  $\text{Mg}_2\text{SnO}_4$ :2 mol%  $\text{Ti}^{4+}$ , (c)  $\text{Mg}_2\text{SnO}_4$ :0.1 mol%  $\text{Mn}^{2+}$ , (d)  $\text{Mg}_2\text{SnO}_4$ :2 mol%  $\text{Ti}^{4+}$ , 0.1 mol%  $\text{Mn}^{2+}$  samples calcined at 1200 °C for 4 h and the standard data for  $\text{Mg}_2\text{SnO}_4$  (JCPDS No. 24-0723) as reference. (e)-(h) are the schematic drawing of the crystal structure of  $\text{Mg}_2\text{SnO}_4$ .

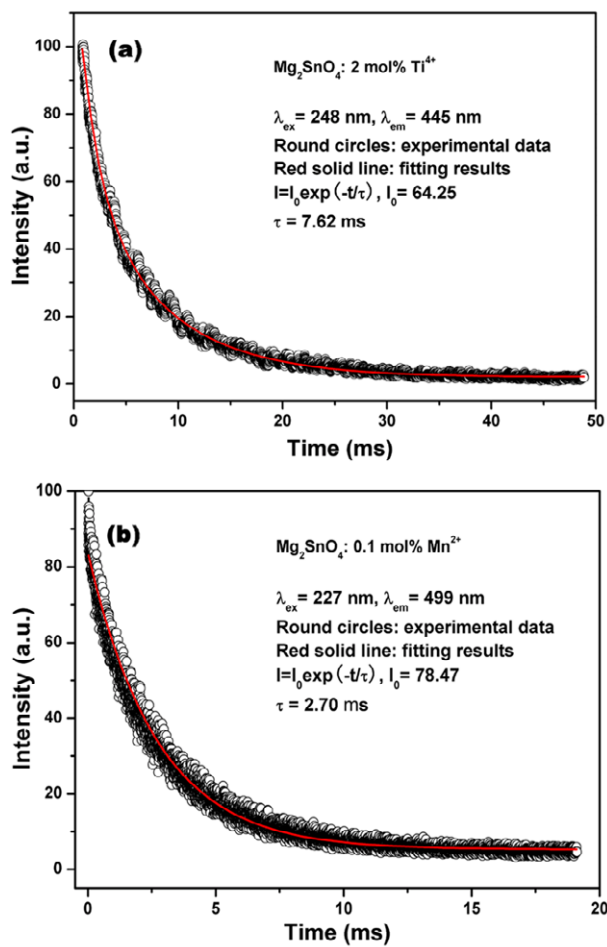

**Fig. S2** The photoluminescence lifetime of  $\text{Ti}^{4+}$  and  $\text{Mn}^{2+}$  ions in the  $\text{Mg}_2\text{SnO}_4$ :2 mol%  $\text{Ti}^{4+}$  and  $\text{Mg}_2\text{SnO}_4$ :0.1 mol%  $\text{Mn}^{2+}$  samples, respectively.

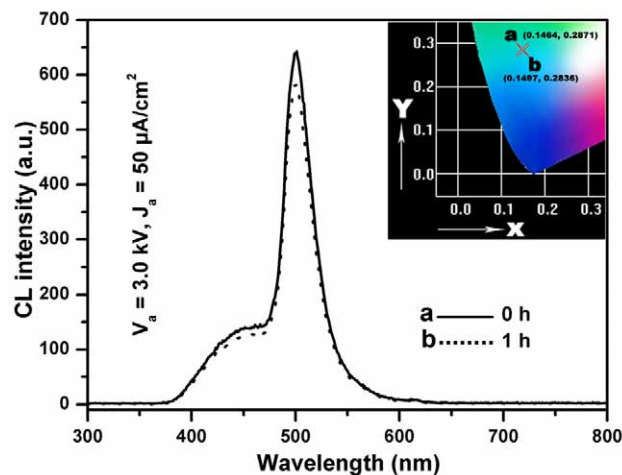

**Figure S3.** The CL spectra of  $\text{Mg}_2\text{SnO}_4: 0.5 \text{ mol\% Ti}^{4+}, 0.025 \text{ mol\% Mn}^{2+}$  sample ( $V_a = 3.0 \text{ kV}$ ,  $J_a = 50 \mu\text{A}/\text{cm}^2$ ), and  $I_a$  denotes the initial intensity for 0 h, and  $I_b$  denotes the intensity after continuous electron beam excitation for 1 h and the inset are their corresponding CIE chromaticity coordinates.  $I_b/I_a = 0.92$ .

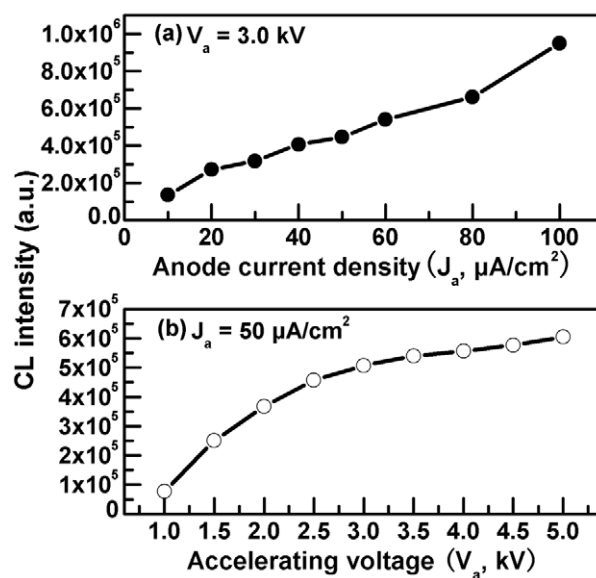

**Fig. S4** The CL intensity of the representative  $\text{Mg}_2\text{SnO}_4: 5 \text{ mol\% Ti}^{4+}, 0.025 \text{ mol\% Mn}^{2+}$  sample as a function of (a) anode current density ( $J_a$ ) and (b) accelerating voltage ( $V_a$ ).
